# Supplementary material for: Heterozygous Knockout of ARID4B Using CRISPR/Cas9 Attenuates Some Aggressive Phenotypes in a Breast Cancer Cell Line
Source: MDPI journal article supplement (doi:10.3390/genes14122184), 2023-12-06
Supplement: s1 [file s1]

**Supplementary Figures for the manuscript**

**Heterozygous knockout of *ARID4B* using CRISPR/Cas9 attenuates some aggressive phenotypes in a breast cancer cell line.**

Fernando Gonzalez-Salinas , Jessica Herrera-Gamboa, Rocio Rojo, and Victor Trevino

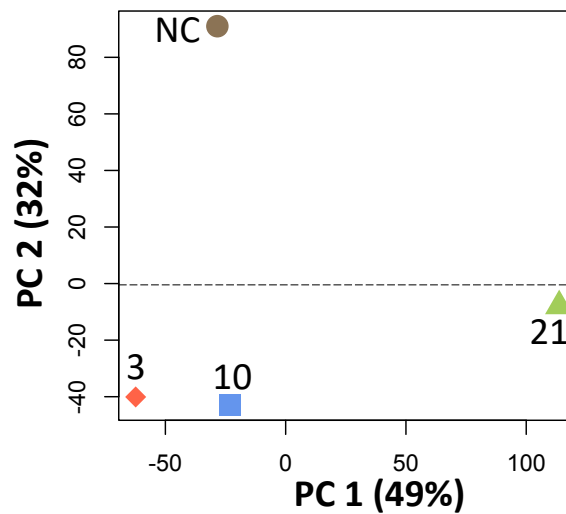

**Figure S1. Principal components analysis of the overall gene expression profiling.** Axes show first and second principal components along with variance explained. Numbers represent clones. NC – Negative Control.

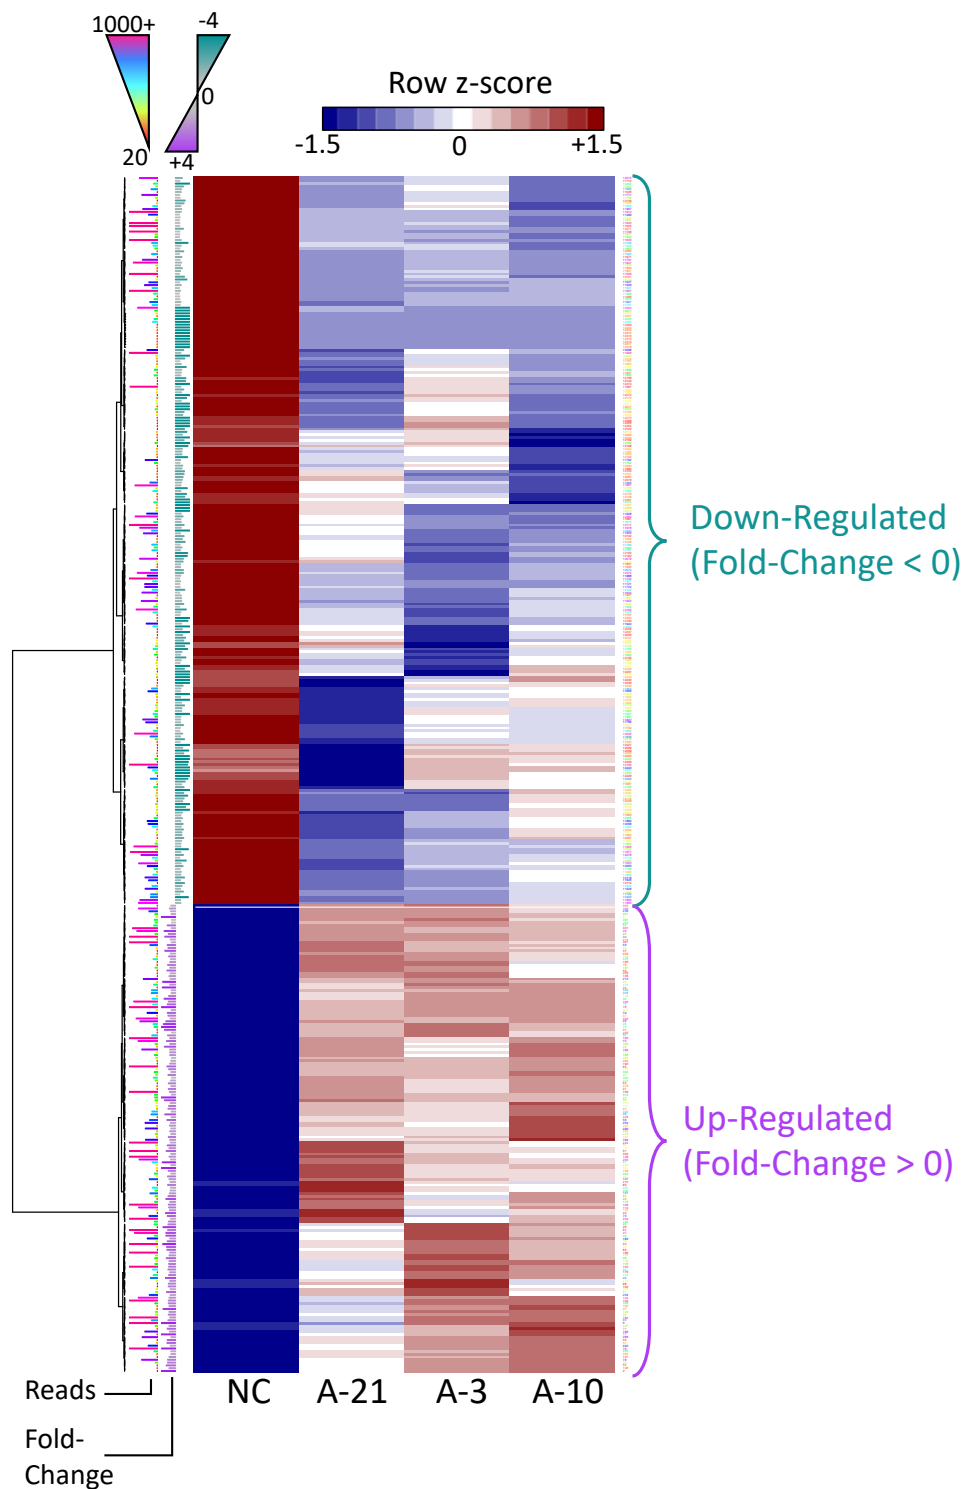

**Figure S2. Heatmap of declared differential expressed genes.** Rows show genes and columns show samples. Rows are scaled to z-score to clarify differences against negative control. Blue represents z-scores < -1 while Red represents z-scores > +1. “Reads” show the number of maximum reads per gene cut to 1,000 for clarity. Fold-Change shows the average fold-change from the three clones. NC – Negative Control, A-3, A-10, A-21 represent the three clones.
